# Supplementary material
Source: PubMed Central journal article supplement (PMC454185)
Supplement: pnas_101_27_10183__1.pdf [file pnas_101_27_10183__1.pdf]

**Table 1. Patient information**

| Patient | Sex | Age, yr | Risk factors | Epilepsy onset, yr | Epilepsy duration, yr | Ictal clinical symptoms/signs | Slow I/Ictal EEG | Epilep. I/Ictal EEG | Ictal EEG onset | Seizure frequency, n/days | Current medications                   | Epileptogenic zone | Surgery |
|---------|-----|---------|--------------|--------------------|-----------------------|-------------------------------|------------------|---------------------|-----------------|---------------------------|---------------------------------------|--------------------|---------|
| 1       | F   | 32      | FC           | 6                  | 26                    | Res+Veg+Exp+O-Aut             | T Reg            | BT Focal            | Reg             | 3/7                       | Carbamazepine, lamotrigine            | L Mes Lat          | L ETL   |
| 2       | F   | 31      | FC           | 6                  | 25                    | Res+O-Aut+Dys                 | T Focal          | T Focal             | Focal           | 3/7                       | Carbamazepine, lamotrigine            | R Mes              | R AMTL  |
| 3       | F   | 30      | FC           | 7                  | 23                    | Res+O-Aut+Veg                 | T Focal          | T Focal             | Focal           | 3/30                      | Carbamazepine, lamotrigine            | R Mes              | R AMTL  |
| 4       | M   | 29      | —            | 6                  | 23                    | Exp+Veg+Staring+O-Aut         | T Focal          | T Focal             | Focal           | 3/30                      | Carbamazepine, lamotrigine            | R Mes Lat          | R ETL   |
| 5       | M   | 40      | FC           | 10                 | 30                    | Res+Veg+Staring+O-Aut+Dys     | BT Focal         | T Focal             | Focal           | 3/7                       | Levetiracetam                         | L Mes              | L AMTL  |
| 6       | F   | 32      | FC           | 20                 | 12                    | Res+Veg+Exp+Staring           | T Focal          | BT Focal            | Focal           | 3/7                       | Carbamazepine, lamotrigine, valproate | L Mes Lat          | L ETL   |

Preoperative patient evaluation included detailed clinical histories, neurological examination, scalp electroencephalogram (EEG), cerebral computed tomography, and magnetic resonance imaging, as detailed before [Palma, E., Esposito, V., Mileo, A. M., Di Gennaro, G., Quarato, P., Giangaspero, F., Scoppetta, C., Onorati, P., Trettel, F., Miledi, R., *et al.* (2002) *Proc. Natl. Acad. Sci. USA* **99**, 15078-15083]. The removal of the brain tissue was clinically indicated to achieve seizure control, and over a follow-up of 2-4 months the patients did not show seizures. F, female; M, male; FC, febrile convulsions; Res, rising epigastric sensation; Veg, vegetative symptoms; O-Aut, oro-alimentary automatisms; Exp, psycho-experiential symptoms; Dys, contralateral upper limb dystonia; BT, bitemporal; T, temporal; Reg, regional; R, right; L, left; Mes, mesial; Lat, lateral; AMTL, anteromesial temporal lobectomy; ETL, extensive temporal lobectomy; I/Ictal, interictal.
